# Supplementary material for: Synthetic antigen-presenting cells reveal the diversity and functional specialisation of extracellular vesicles composing the fourth signal of T cell immunological synapses
Source: bioRxiv or medRxiv preprint supplement (doi:10.1101/2021.05.29.445691), 2021-08-19
Supplement: Supplementary file [file media-12.pdf]

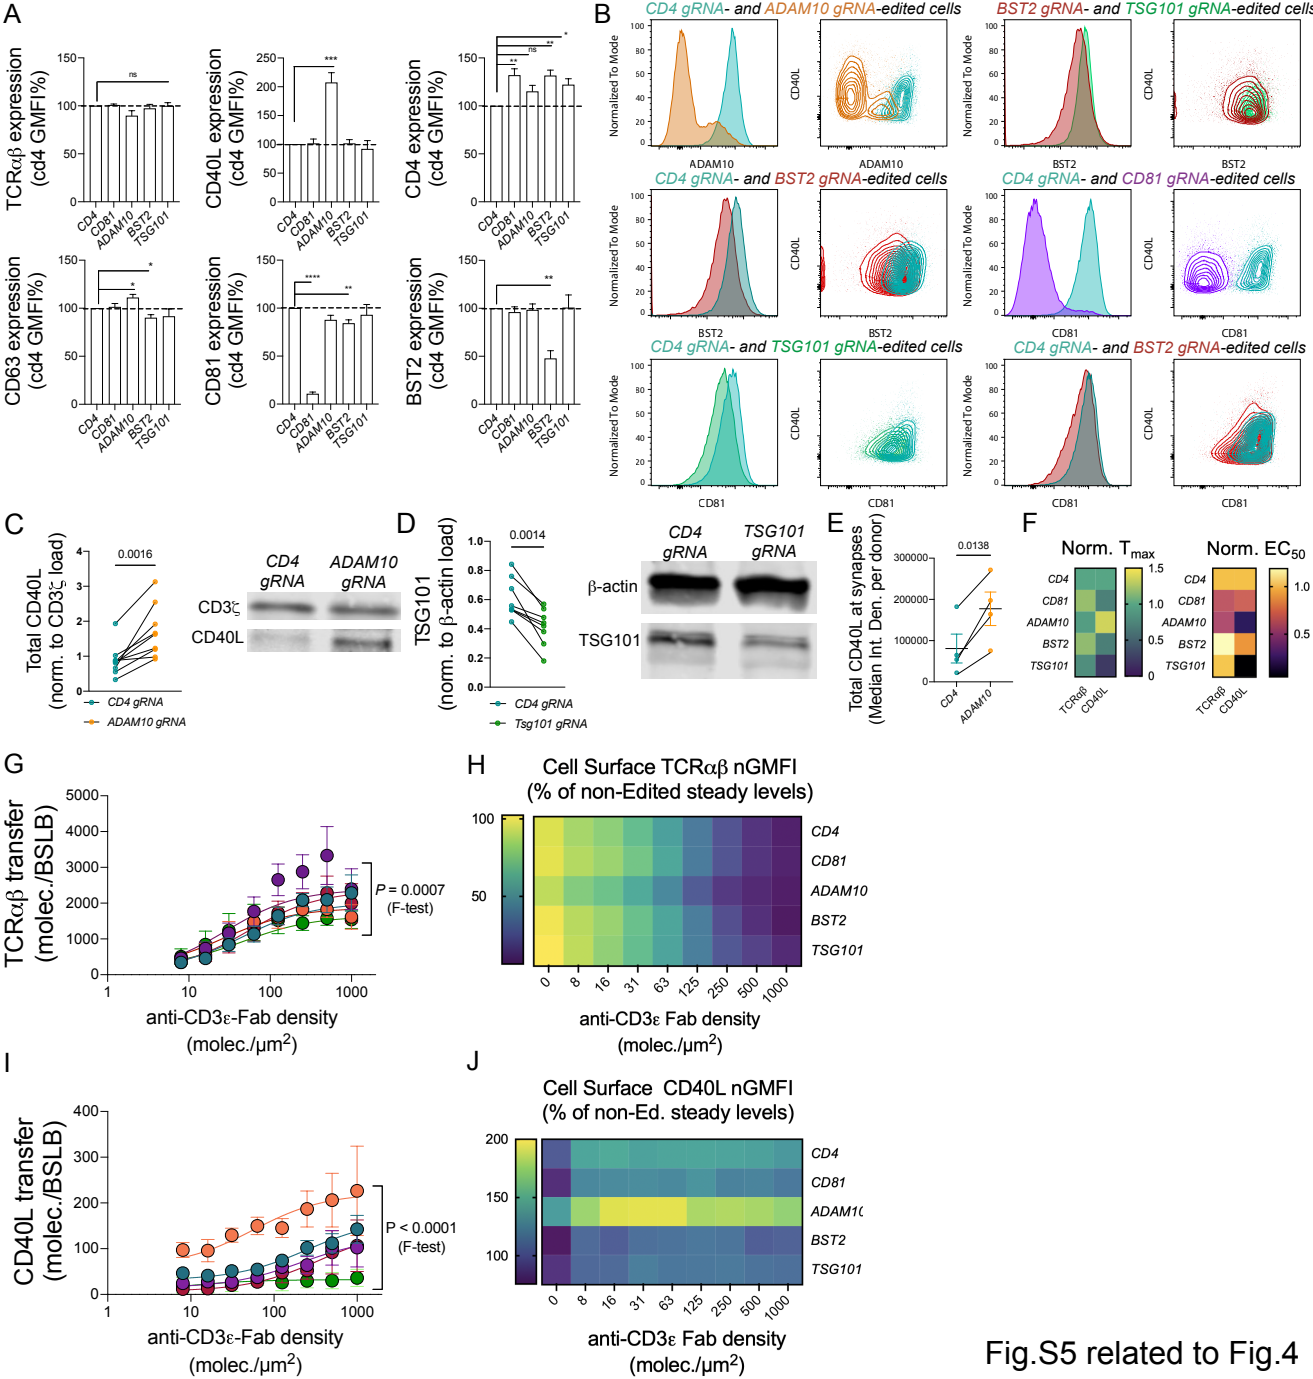

Fig.S5 related to Fig.4
